# Supplementary material for: Collection of vaccination data in the German National Cohort
Source: Springer Nature journal article supplement (doi:10.1007/s00103-014-2050-0), 2014-10-07
Supplement: MOESM1 [file 8013278]

## Supplement

**Table 1:** Assessment of vaccination data from vaccination cards submitted in terms of completeness

|                                                                                                     |                                                              | Hamburg    | Hannover   | Bremen    | Total      |
|-----------------------------------------------------------------------------------------------------|--------------------------------------------------------------|------------|------------|-----------|------------|
| Q1: ever possessed a vaccination certificate?                                                       | yes                                                          | 95.0       | 96.6       | 96.1      | 95.8       |
|                                                                                                     | no                                                           | 3.5        | 3.4        | 3.9       | 3.5        |
|                                                                                                     | d.k.                                                         | 1.5        | -          | -         | 0.7        |
|                                                                                                     | <b>N</b>                                                     | <b>200</b> | <b>175</b> | <b>51</b> | <b>426</b> |
| Q2: possession of vaccination certificate at present?                                               | yes                                                          | 88.4       | 92.9       | 91.8      | 90.7       |
|                                                                                                     | no                                                           | 10.5       | 5.3        | 8.2       | 8.1        |
|                                                                                                     | d.k.                                                         | 1.1        | 1.8        | -         | 1.2        |
|                                                                                                     | <b>N</b>                                                     | <b>190</b> | <b>169</b> | <b>49</b> | <b>408</b> |
| Q3: No. of vaccination certificates                                                                 | 1                                                            | 36.9       | 43.9       | 26.7      | 38.6       |
|                                                                                                     | 2                                                            | 36.9       | 44.6       | 51.1      | 41.9       |
|                                                                                                     | 3                                                            | 14.9       | 6.4        | 8.9       | 10.5       |
|                                                                                                     | 4                                                            | 1.8        | 1.3        | -         | 1.4        |
|                                                                                                     | d.k.                                                         | 9.5        | 3.8        | 13.3      | 7.6        |
| Q4: Vaccination certificate provided?                                                               | yes                                                          | 88.7       | 90.4       | 84.4      | 88.9       |
|                                                                                                     | no                                                           | 11.3       | 9.6        | 15.6      | 11.1       |
|                                                                                                     | <b>N</b>                                                     | <b>168</b> | <b>157</b> | <b>45</b> | <b>370</b> |
| Q5: Other vaccination documents?                                                                    | yes                                                          | 19.5       | 15.4       | 17.6      | 17.6       |
|                                                                                                     | no                                                           | 74.0       | 76.0       | 78.4      | 75.4       |
|                                                                                                     | d.k.                                                         | 6.5        | 8.6        | 3.9       | 7.0        |
| Q6: Complete vaccination data brought?                                                              | yes                                                          | 63.5       | 72.0       | 62.7      | 66.9       |
|                                                                                                     | no                                                           | 29.0       | 19.4       | 35.3      | 25.8       |
|                                                                                                     | d.k.                                                         | 7.5        | 8.6        | 2.0       | 7.2        |
| Q7: All vaccinations received included?                                                             | yes                                                          | 52.0       | 61.7       | 49.0      | 55.6       |
|                                                                                                     | no                                                           | 23.0       | 22.3       | 33.3      | 23.9       |
|                                                                                                     | d.k.                                                         | 25.0       | 16.0       | 17.7      | 20.5       |
|                                                                                                     | <b>N</b>                                                     | <b>200</b> | <b>175</b> | <b>51</b> | <b>426</b> |
| Q7a: Vaccinations, which are not documented in vaccination certificate (multiple answers possible): |                                                              |            |            |           |            |
|                                                                                                     | Tetanus                                                      | 17.6       | 22.6       | 10.0      | 18.7       |
|                                                                                                     | Influenza                                                    | 16.2       | 17.7       | 15.0      | 16.7       |
|                                                                                                     | Vaccinations in childhood                                    | 7.4        | 11.3       | 35.0      | 12.7       |
|                                                                                                     | Smallpox                                                     | 10.3       | 6.5        | 5.0       | 8.0        |
|                                                                                                     | Hepatitis B                                                  | 2.9        | 4.8        | 5.0       | 4.0        |
|                                                                                                     | Poliomyelitis                                                | 13.2       | 1.6        | 5.0       | 7.3        |
|                                                                                                     | FSME                                                         | 2.9        | -          | -         | 1.3        |
|                                                                                                     | Don't know/no answer                                         | 38.2       | 43.5       | 40.0      | 40.7       |
|                                                                                                     |                                                              | <b>68</b>  | <b>62</b>  | <b>20</b> | <b>150</b> |
| Q8: Attitude towards vaccinations:                                                                  |                                                              |            |            |           |            |
|                                                                                                     | positive                                                     | 73.3       | 75.6       | 71.4      | 74.0       |
|                                                                                                     | critical                                                     | 17.4       | 16.9       | 20.4      | 17.5       |
|                                                                                                     | opposed against vaccinations                                 | -          | -          | 2.0       | 0.2        |
|                                                                                                     | no issue of concern                                          | 9.2        | 7.6        | 6.1       | 8.2        |
|                                                                                                     | <b>N</b>                                                     | <b>195</b> | <b>172</b> | <b>49</b> | <b>416</b> |
| Q8a: Reason if attitude not positive                                                                |                                                              |            |            |           |            |
|                                                                                                     | Afraid of side effects (yes)                                 | 44.1       | 53.6       | 27.3      | 45.2       |
|                                                                                                     | Not enough information about necessity of vaccinations (yes) | 17.6       | 14.3       | -         | 13.7       |
|                                                                                                     | Vaccines may overwhelm the immune system (yes)               | 29.4       | 28.6       | 36.4      | 30.1       |
|                                                                                                     | Not enough information about risks of                        | 35.3       | 21.4       | 9.1       | 26.0       |

|                     |           |           |           |           |
|---------------------|-----------|-----------|-----------|-----------|
| vaccinations (yes)  |           |           |           |           |
| Other reasons (yes) | 32.4      | 39.3      | 90.9      | 43.8      |
| <b>N</b>            | <b>34</b> | <b>28</b> | <b>11</b> | <b>73</b> |
